# Supplementary material for: LIM kinase regulation of cytoskeletal dynamics is required for salivary gland branching morphogenesis
Source: PubMed Central journal article supplement — Mol Biol Cell. 2014 Aug 15;25(16):2393–407. doi: 10.1091/mbc.E14-02-0705 (PMC4142612; doi:10.1091/mbc.e14-02-0705), 2014-08-15

# Supplemental Materials

*Molecular Biology of the Cell*

Ray et al.

**Figure S1. Western analysis to confirm protein KD, morphometric and time-lapse analysis to show regulation of cleft initiation and progression.** E13 SMG explants were grown for specific time points +/- siRNAs and subjected to Western Analysis. (A) Under 48 hours of incubation, LIMK 1 siRNA shows 41% knockdown and LIMK 2 siRNA exhibits 51% KD. (B) 24 hours incubation with p25 siRNA results in an 54% reduction in protein and (C) cofilin siRNA shows 40% KD in E13 intact SMGs. (n=3, ANOVA) (D) Brightfield images were quantified after 24 hr of incubation with BMS-5, LIMK 1+2 siRNA and cofilin siRNA. LIMK inhibition and KD and cofilin KD exhibit a significantly reduced number of stable initiated clefts relative to negative control SMGs. (n= 6, ANOVA) (E) Cofilin KD glands show slow progression (Late stage delayed clefts - red arrowhead) and lack of termination in 20 hours (white arrows). (Scale, 50  $\mu$ m) \* P<0.05, \*\* P< 0.01, \*\*\*P<0.001

**Figure S2. Effect of LIMK inhibitor BMS-5 and Taxol on E13 SMG.** (A) BMS-5-treated glands exhibit reduced levels of phosphorylated cofilin relative to vehicle control-treated gland, when normalized to SYBR green staining intensity. (n= 6) (B) LIMK inhibition by BMS-5 changes epithelial cell shapes by decreasing perimeter (C) and area of cells (D) as shown by E-cadherin staining in green and FN in red. (n= 250, Scale, 20  $\mu$ m) (E) Taxol treatment induces over stabilization of microtubules and hence increases  $\beta$ -tubulin staining intensity around the epithelial cellular periphery. (F) BMS-5 did not affect apoptosis in E13 glands, as compared to Brefeldin A (BFA). (n= 3) (G) No significant reduction in phospho-paxillin at Tyr 118 was observed with BMS-5 treatment as seen with immunostaining of E13 epithelial rudiments and (H) western analysis of intact E13 SMGs. (n= 3) (I) A minor reduction in phospho-paxillin (Y118) was observed in LIMK and p25 KD glands using immunocytochemistry in E13 epithelial rudiments. (Scale, 20  $\mu$ m, Paired T-test) \*\*\*P<0.001

**Figure S3. Washout of BMS-5 after 72 hours restores branching, cofilin KD reduces focal adhesion assembly and exogenous FN stimulates cofilin phosphorylation and FAK activation.** (A) E13 SMGs showed significant structural recovery through increased branching following BMS-5 washout after 24 hours, relative to BMS-5-treated glands. (Scale, 200  $\mu$ m) (B) Glands subjected to BMS-5 washout exhibit increased levels of phosphorylated cofilin relative to BMS-5 treated glands. (C) Western blot and densitometric analysis shows increased phosphorylated cofilin in BMS-5 washout explants relative to BMS-5 treated glands. (n= 3,

ANOVA) (D) Glands subjected to 72 hours of treatment with BMS-5 shows loss of branched architecture and reduced F-actin relative to vehicle-treated control glands. Glands subjected to 48 hour BMS-5 washout show recovery of branching by formation of acinar units with cortical localization of F-actin. (Scale, 20  $\mu$ m). (E,F) SMGs treated with cofilin siRNA show reduced focal adhesion activation in the basal periphery of the epithelium as compared to glands treated with negative control siRNAs. (Scale, 20  $\mu$ m) (G) Exogenously added plasma FN stimulates FAK phosphorylation (Y397) and cofilin phosphorylation (Ser3) in intact E13 SMGs. (n= 3, Paired T-test) \* P<0.05, \*\* P< 0.01, \*\*\*P<0.001

**Figure S4. FN deposition is affected with LIMK 1/2 and p25 KD.** (A) Mesenchyme-free rudiments pre-treated with Alexa-647 labeled purified human plasma FN show reduced basal deposition and aberrant ectopic deposition in the interior of the epithelium upon downregulation of LIMK and p25. (Scale, 20  $\mu$ m) (B) Intact glands were immunostained with E-cadherin (red) and FN (cyan) upon LIMK and p25 KD. 2X zoomed images indicate the aberrant interiorly deposited FN likely to be extracellular. (Scale, 10  $\mu$ m)

**Figure S5. LIMK-mediated inhibition of branching morphogenesis is rescued by knockdown of cofilin and p25.** (A, B) In the presence of LIMK inhibition and KD, cofilin siRNA and a combination of cofilin and p25 siRNAs, respectively were used. Western Blot and densitometric analysis reveals cofilin KD to be 34% and p25 KD to be 37%. (n=3, \*P< 0.05, \*\*\*P<0.001, ANOVA) (B) The effect of LIMK knockdown on F-actin formation and FAK phosphorylation at Y397 was restored using p25 and cofilin siRNA in the presence of LIMK 2 siRNA. (Scale, 20  $\mu$ m)

**Figure S6. Rescue of LIMK inhibition restores microtubule dynamics and hence FN deposition and assembly in the cleft regions of rescued glands.** (A) E13 organ explants treated with LIMK 2 siRNA and immunostained with  $\beta$ -tubulin shows increased staining around the cellular periphery.  $\beta$ -tubulin distribution in the epithelium of the LIMK 2 rescued glands were found to resemble that of the negative-control siRNA treated glands. (Scale, 20  $\mu$ m) (B) LIMK inhibition by BMS-5 displays a decrease in assembled FN (L8 staining, red) around the epithelial periphery relative to negative control-treated SMGs. Reduced deposition of FN (Alexa-647 purified human plasma FN cyan) is observed in the interior of the epithelium in BMS-5 treated

glands. These defects in deposition and assembly of FN are rescued by restoring the actin dynamics in the SMGs. (Scale, 20  $\mu\text{m}$ ).

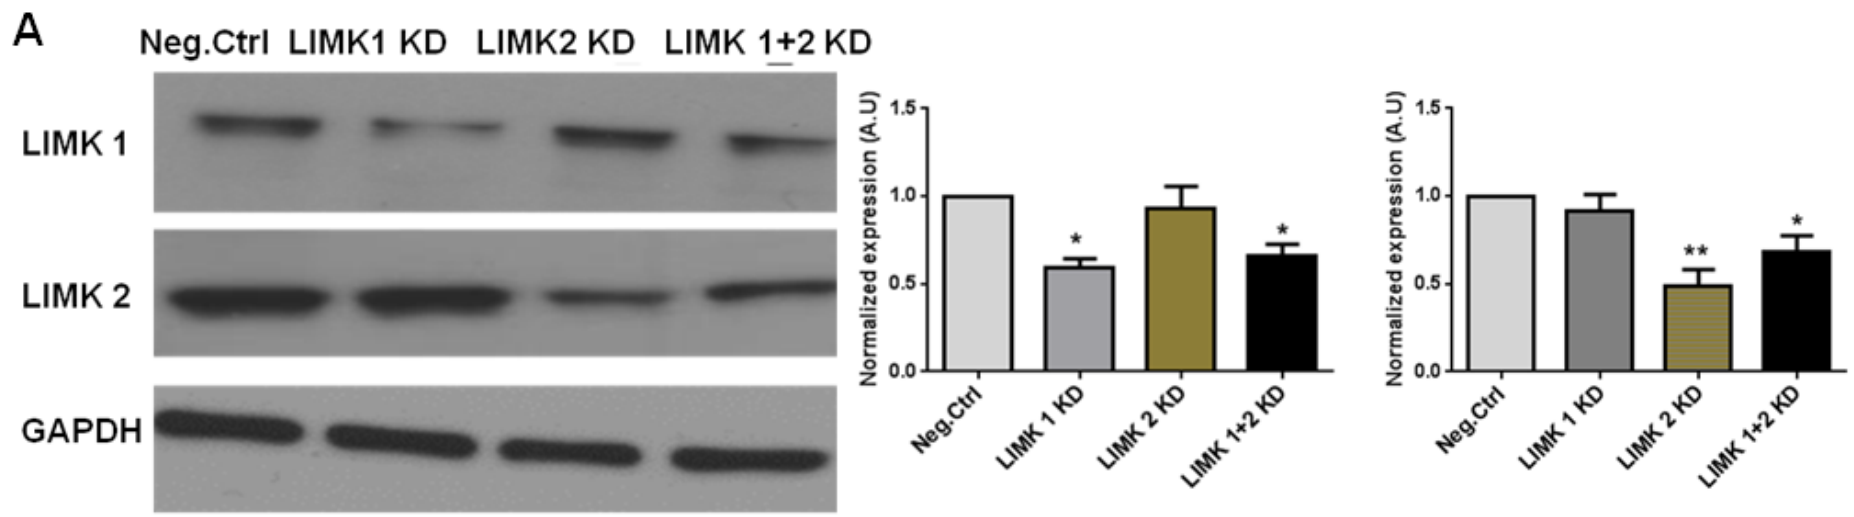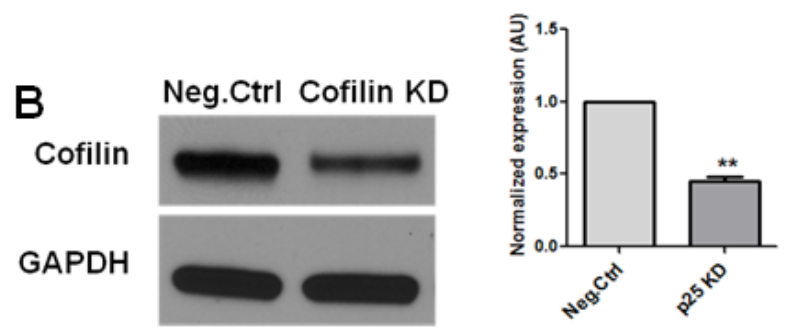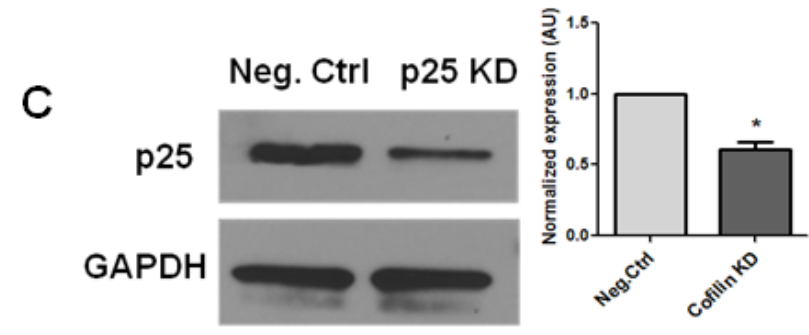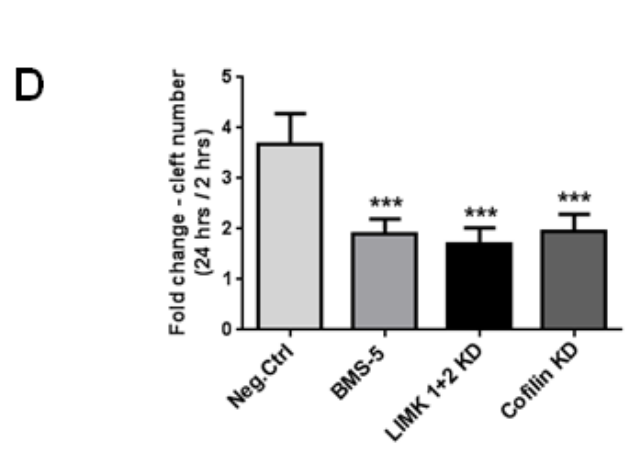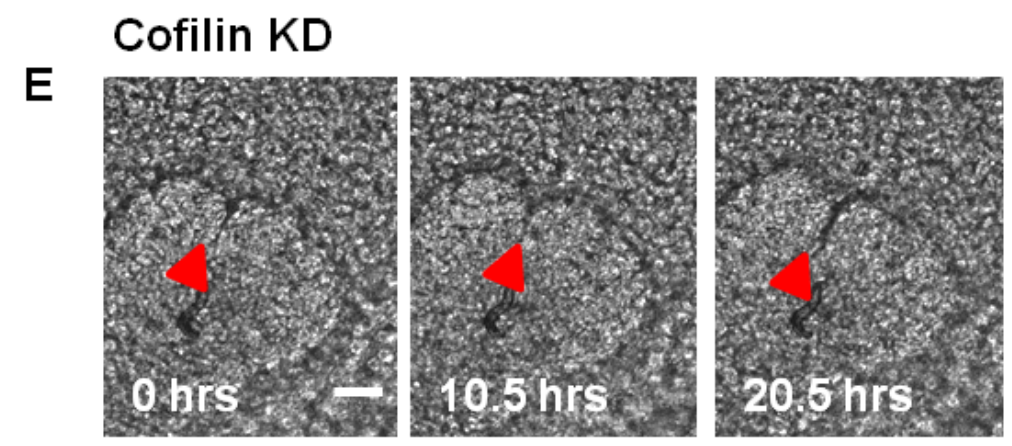

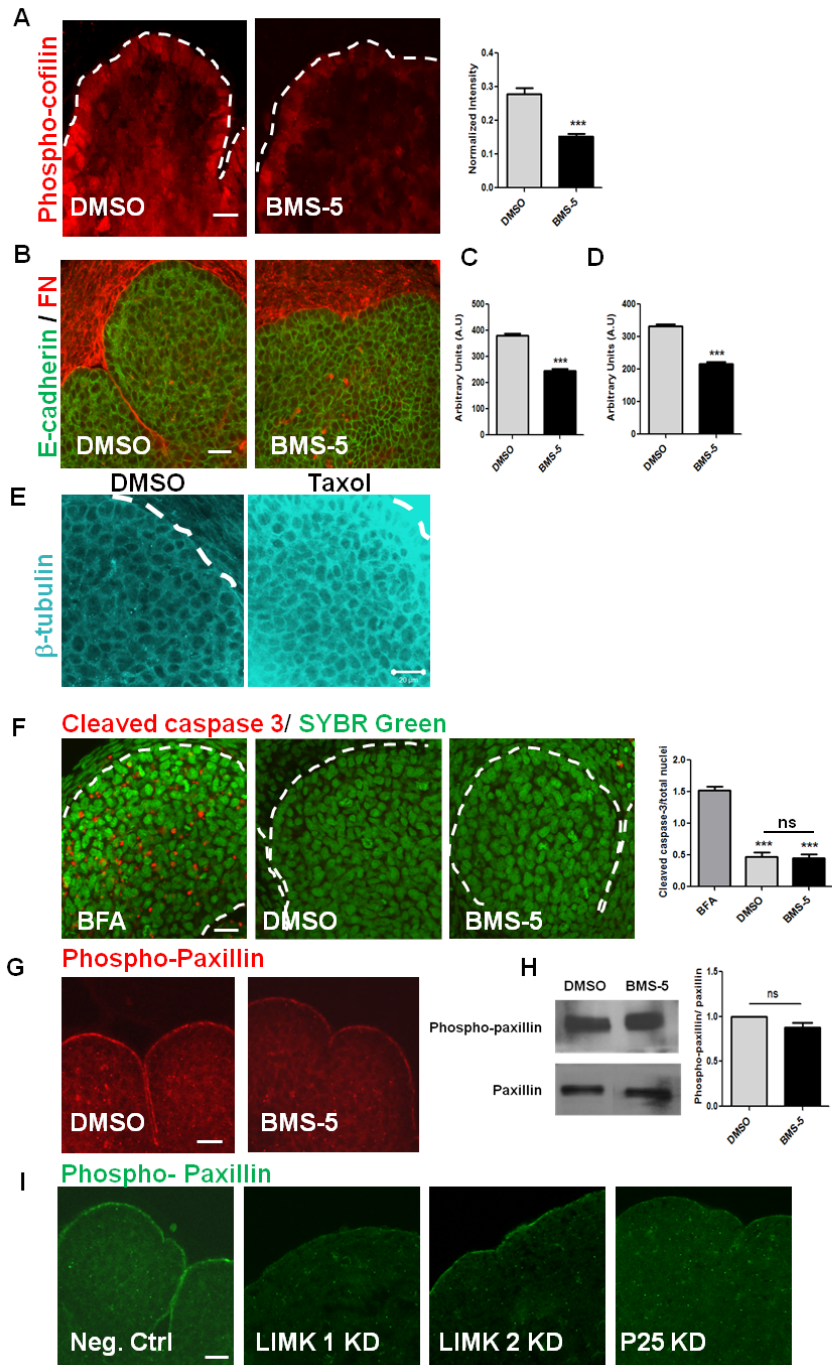

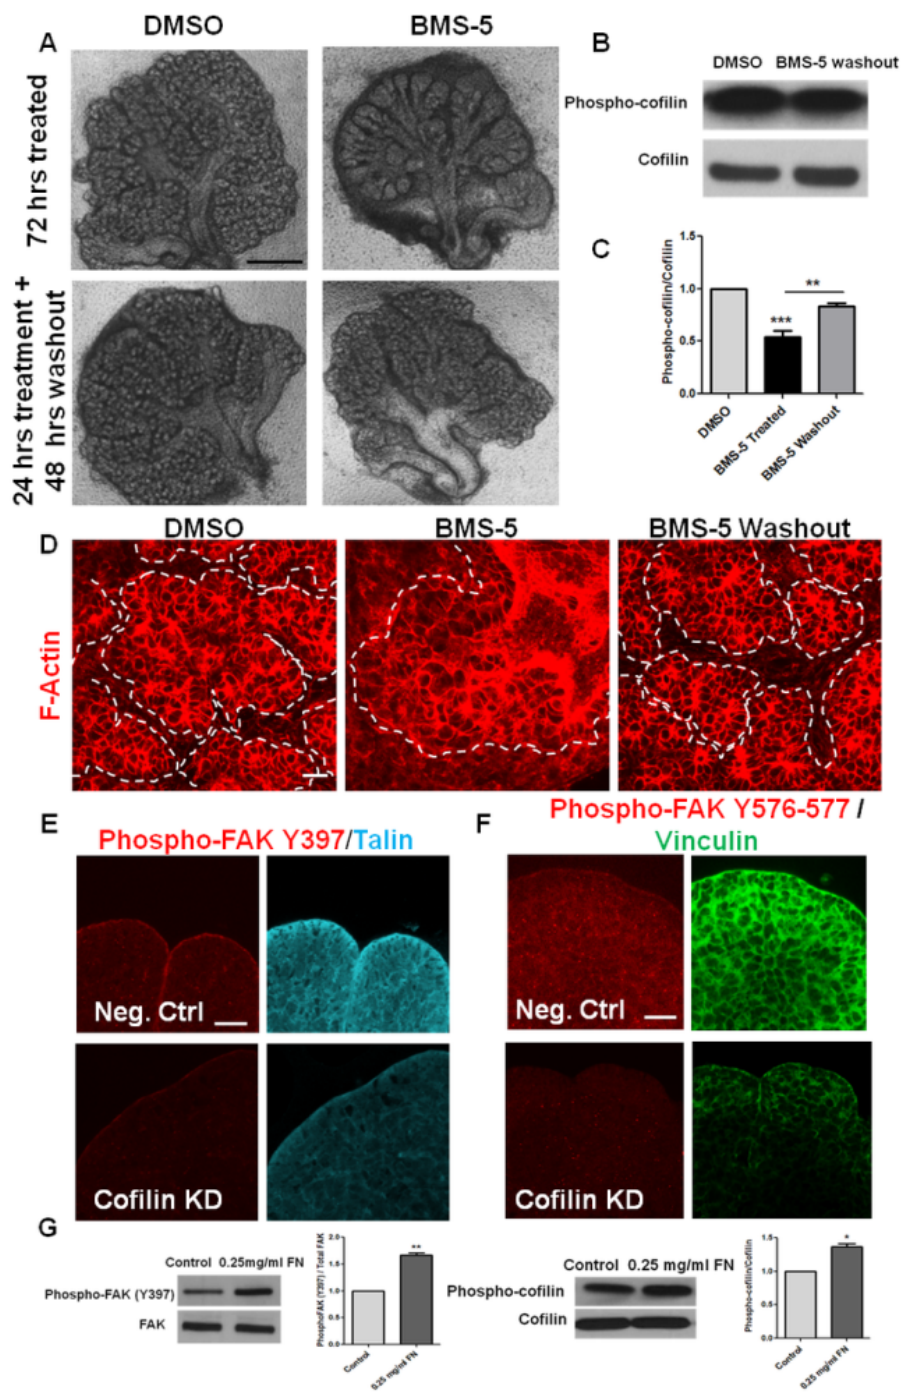

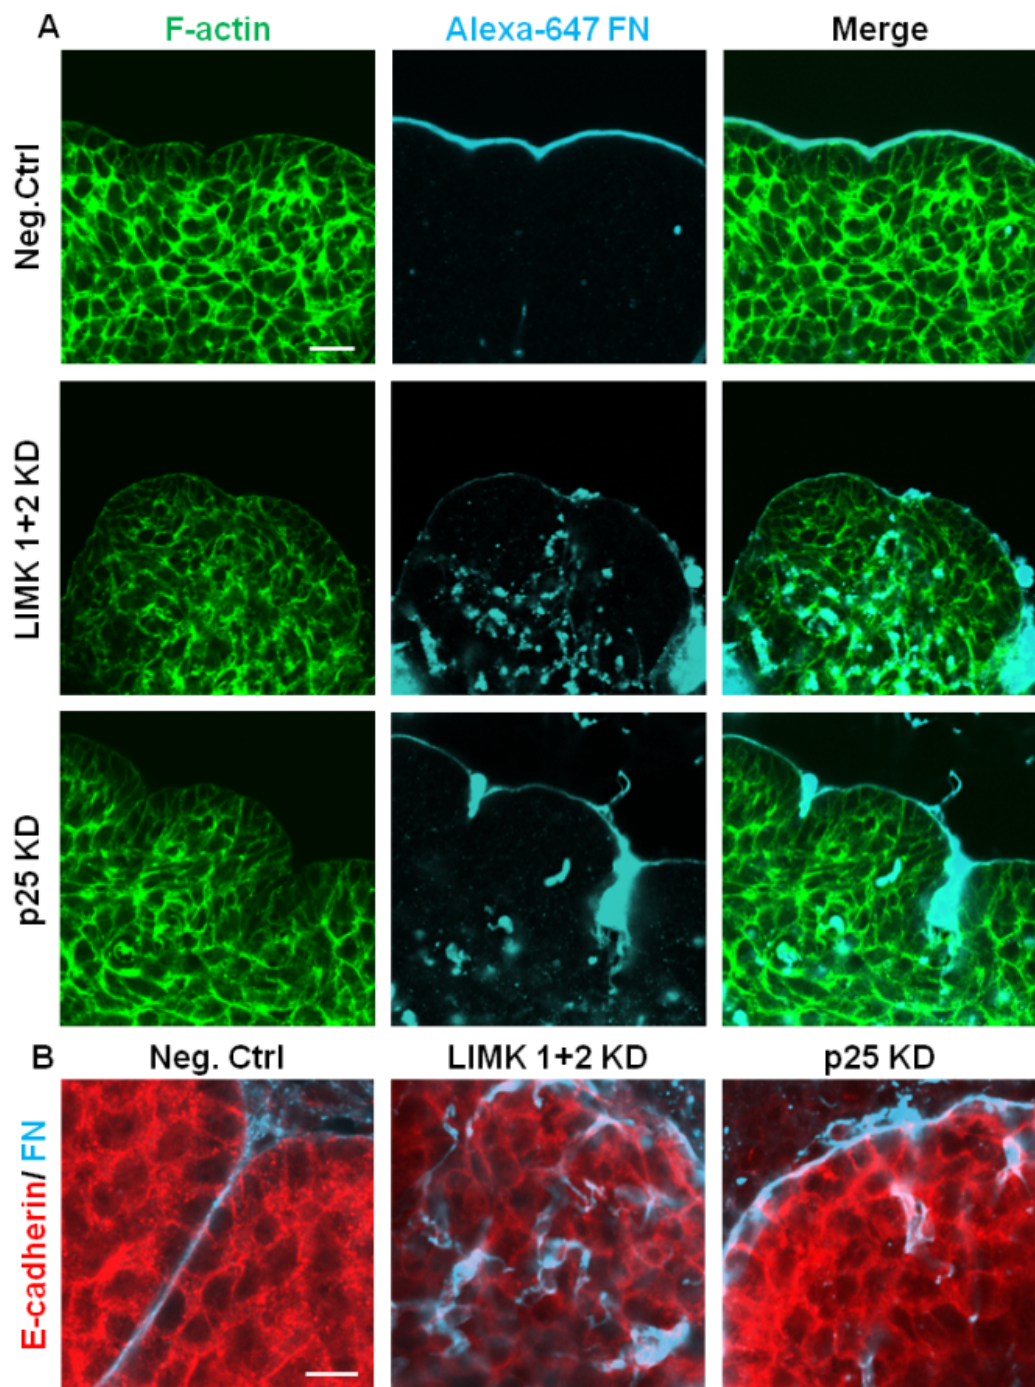



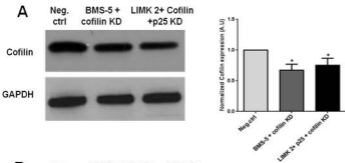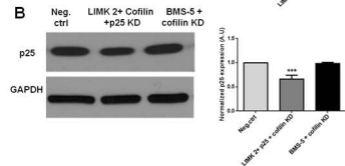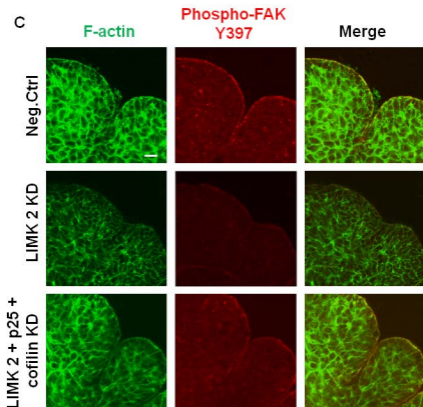

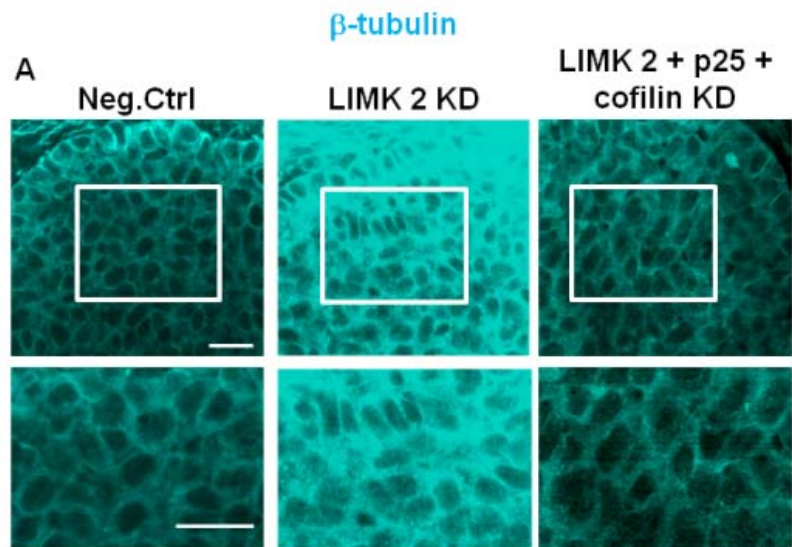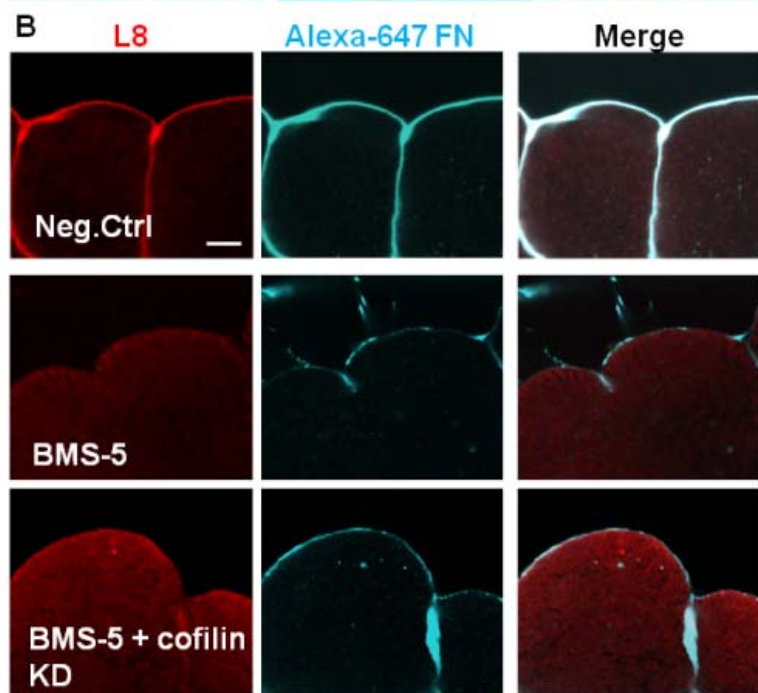

Supplement: supp_E14-02-0705v1_E14-02-0705CombinedSupMats.pdf [file supp_E14-02-0705v1_E14-02-0705CombinedSupMats.pdf]
